# Supplementary material for: Effect of Polyethylene Glycol Additive on the Structure and Performance of Fabric-Reinforced Thin Film Composite
Source: MDPI journal article supplement (doi:10.3390/molecules28052318), 2023-03-02
Supplement: s1 [file s1]

**Table S1.** Intrinsic properties of PSU/PEG supported TFC-FO membranes.

| Membrane    | $A$ (L m <sup>-2</sup> h <sup>-1</sup> bar <sup>-1</sup> ) | $B$ (L m <sup>-2</sup> h <sup>-1</sup> ) | $A/B$ (bar <sup>-1</sup> ) | $S$ (×10 <sup>-6</sup> m) |
|-------------|------------------------------------------------------------|------------------------------------------|----------------------------|---------------------------|
| TFC/PEG10-1 | 0.93±0.22                                                  | 0.14±0.04                                | 6.85±0.95                  | 342.3±37.3                |
| TFC/PEG10-2 | 1.08±0.21                                                  | 0.16±0.05                                | 6.95±0.35                  | 296.0±21.7                |
| TFC/PEG10-3 | 1.12±0.11                                                  | 0.17±0.02                                | 6.56±1.42                  | 263.3±2.5                 |
| TFC/PEG10-4 | 1.16±0.07                                                  | 0.12±0.01                                | 9.43±1.43                  | 253.0±9.0                 |
| TFC/PEG20-1 | 0.78±0.04                                                  | 0.13±0.04                                | 6.66±2.23                  | 368.0±22.1                |
| TFC/PEG20-2 | 0.71±0.06                                                  | 0.10±0.00                                | 7.33±0.38                  | 268.0±4.2                 |
| TFC/PEG20-3 | 0.75±0.05                                                  | 0.09±0.03                                | 8.03±0.57                  | 265.2±7.8                 |
| TFC/PEG20-4 | 0.61±0.07                                                  | 0.09±0.02                                | 6.98±2.18                  | 286.7±23.1                |

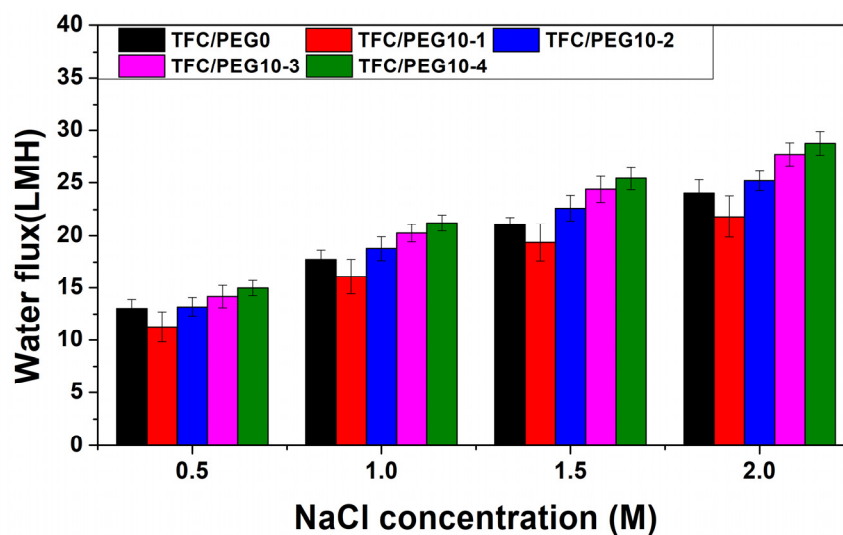**Figure S1.** Water flux of PSU/PEG10 supported TFC-FO membranes.

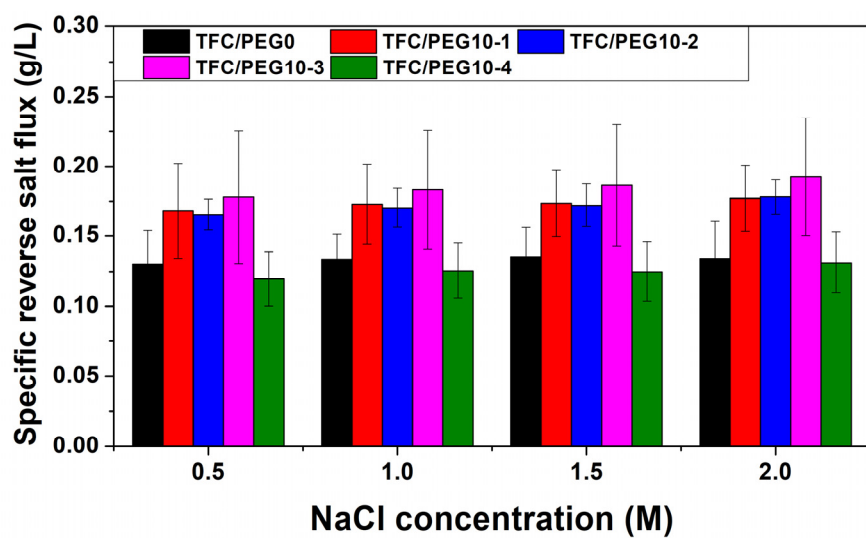

**Figure S2.** Specific reverse salt flux of PSU/PEG10 supported TFC-FO membranes.

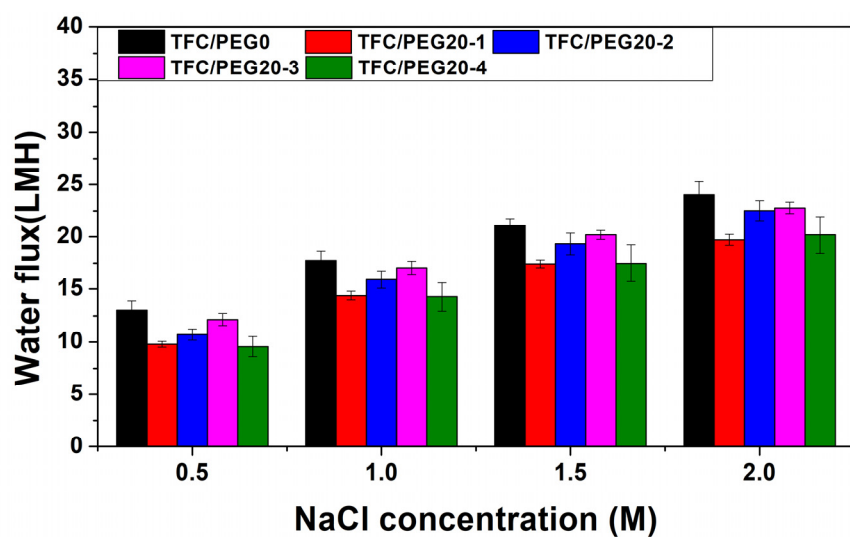

**Figure S3.** Water flux of PSU/PEG20 supported TFC-FO membranes.

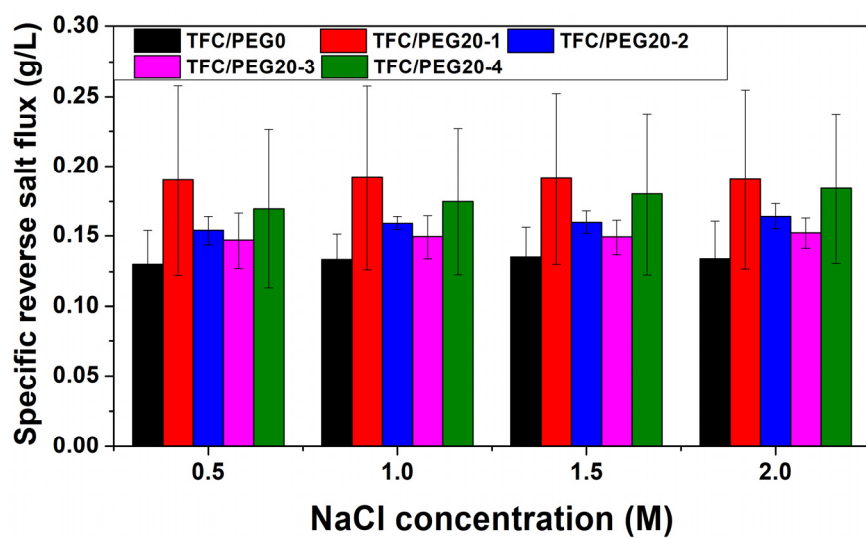

**Figure S4.** Specific reverse salt flux of PSU/PEG20 supported TFC-FO membranes.

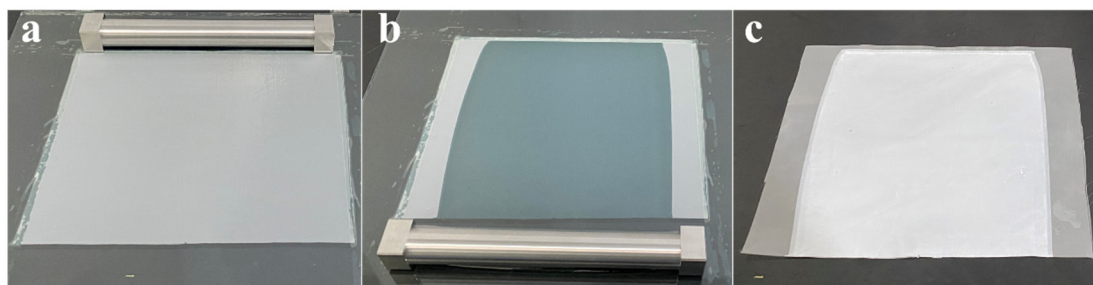

**Figure S5.** The preparation process images including: (a) before casting, (b) after casting, (c) after phase inversion.
